# Supplementary material for: Analysis Of The KLIC-score; An Outcome Predictor Tool For Prosthetic Joint Infections Treated With Debridement, Antibiotics And Implant Retention
Source: PubMed Central journal article supplement — J Bone Jt Infect. 2018 Jul 27;3(3):150–5. doi: 10.7150/jbji.21846 (PMC6098819; doi:10.7150/jbji.21846), 2018-07-27
Supplement: jbjiv03p0150s1.pdf [file jbjiv03p0150s1.pdf]

## Appendix 1.1

### Patient information and outcomes

| Patient | Age | Gender | Primary/revision | Arthroplasty | Organism(s) <sup>a</sup>           | Implant-DAIR duration (weeks) <sup>b</sup> | Symptom onset-DAIR (days) <sup>c</sup> | KLIC-score | Treatment failure |
|---------|-----|--------|------------------|--------------|------------------------------------|--------------------------------------------|----------------------------------------|------------|-------------------|
| 1       | 81  | f      | Primary          | TKA          | No growth                          | 1w 5d                                      | 0                                      | 2          | Yes               |
| 2       | 58  | m      | Revision         | TKA          | No growth                          | 4w 1d                                      | 0                                      | 7.5        | No                |
| 3       | 77  | f      | Primary          | TKA          | No growth                          | 8w 2d                                      | 0                                      | 2          | No                |
| 4       | 86  | f      | Primary          | TKA          | No growth                          | 14w                                        | 84                                     | 2          | Yes               |
| 5       | 91  | m      | Revision         | TKA          | No growth                          | 44w 6d                                     | -                                      | 5.5        | Yes               |
| 6       | 69  | m      | Revision         | TKA          | No growth                          | 104w 5d                                    | 67                                     | 2          | Yes               |
| 7       | 64  | m      | Primary          | TKA          | Pseudomonas, enterococcus, proteus | 4w                                         | 3                                      | 2          | No                |
| 8       | 81  | f      | Revision         | TKA          | Strep. Pneumoniae                  | 382w 4d                                    | 6                                      | 6.5        | No                |
| 9       | 84  | m      | Revision         | TKA          | Citrobacter                        | 41w 5d                                     | 6                                      | 7.5        | Yes               |
| 10      | 76  | m      | Revision         | TKA          | Citrobacter                        | 80w 6d                                     | 206                                    | 3.5        | Yes               |
| 11      | 80  | f      | Primary          | TKA          | E. Faecalis                        | 2w 5d                                      | 5                                      | 4.5        | No                |
| 12      | 71  | m      | Primary          | TKA          | Group B Strep.                     | 33w 6d                                     | 3                                      | 4.5        | No                |
| 13      | 81  | m      | Revision         | TKA          | Group B Strep.                     | 366w 5d                                    | 6                                      | 6          | No                |
| 14      | 54  | f      | Primary          | PFJR         | Strep. Agalacticae                 | -                                          | 0                                      | 4.5        | No                |
| 15      | 85  | f      | Primary          | TKA          | Strep. Parasanguinus               | 27w 4d                                     | 4                                      | 6.5        | No                |
| 16      | 68  | f      | Primary          | TKA          | S. Aureus                          | 5w 3d                                      | 0                                      | 4.5        | Yes               |
| 17      | 87  | m      | Primary          | TKA          | S. Aureus                          | 5w 5d                                      | 1                                      | 6          | No                |
| 18      | 81  | f      | Revision         | TKA          | S. Aureus                          | 8w 6d                                      | 0                                      | 5          | No                |
| 19      | 71  | f      | Primary          | TKA          | S. Aureus                          | 184w                                       | 1                                      | 5.5        | No                |
| 20      | 59  | m      | Primary          | TKA          | S. Aureus                          | 344w 1d                                    | 36                                     | 6.5        | Yes               |
| 21      | 80  | m      | Primary          | UKA          | S. Aureus                          | -                                          | -                                      | 6          | Yes               |
| 22      | 55  | m      | Primary          | PFJR         | S. Aureus                          | 156w 5d                                    | 1                                      | 2          | No                |
| 23      | 55  | m      | Primary          | TKA          | S. Aureus                          | 1w 4d                                      | 6                                      | 4.5        | No                |
| 24      | 73  | f      | Primary          | TKA          | S. Aureus                          | 3w                                         | 1                                      | 2          | No                |
| 25      | 63  | m      | Primary          | TKA          | S. Aureus                          | 13w 1d                                     | 19                                     | 4.5        | Yes               |
| 26      | 65  | f      | Primary          | TKA          | S. Aureus                          | 18w                                        | 7                                      | 4.5        | No                |
| 27      | 71  | m      | Primary          | TKA          | S. Aureus                          | 22w 2d                                     | 2                                      | 8          | Yes               |
| 28      | 73  | f      | Primary          | TKA          | S. Aureus                          | 29w 5d                                     | 5                                      | 4.5        | No                |
| 29      | 75  | f      | Primary          | TKA          | S. Aureus                          | 29w 6d                                     | 16                                     | 6.5        | No                |
| 30      | 52  | m      | Primary          | TKA          | S. Aureus                          | 85w                                        | 3                                      | 6.5        | Yes               |
| 31      | 75  | m      | Primary          | TKA          | S. Aureus                          | 93w 1d                                     | 11                                     | 3.5        | No                |
| 32      | 73  | f      | Primary          | TKA          | S. Aureus                          | 133w 6d                                    | 6                                      | 6          | No                |
| 33      | 81  | m      | Primary          | TKA          | S. Aureus                          | 229w                                       | 2                                      | 3.5        | No                |
| 34      | 72  | m      | Revision         | TKA          | S. Aureus                          | 245w 3d                                    | 1                                      | 6          | No                |
| 35      | 73  | f      | Primary          | TKA          | S. Aureus                          | 288w 6d                                    | 12                                     | 4          | Yes               |
| 36      | 80  | f      | Primary          | TKA          | S. Aureus                          | 486w 4d                                    | 7                                      | 4.5        | No                |
| 37      | 84  | m      | Revision         | TKA          | CoNS                               | 3w                                         | 0                                      | 3.5        | No                |
| 38      | 81  | m      | Primary          | TKA          | CoNS                               | 5w                                         | 10                                     | 2          | No                |
| 39      | 74  | f      | Primary          | TKA          | CoNS, bacillus sp.                 | 6w 1d                                      | 8                                      | 4.5        | No                |
| 40      | 48  | m      | Revision         | TKA          | CoNS                               | 6w 4d                                      | 12                                     | 5          | No                |
| 41      | 69  | f      | Primary          | TKA          | CoNS                               | 8w                                         | 56                                     | 4.5        | No                |

## Patient information and outcomes

| Patient | Age | Gender | Primary/revision | Arthroplasty | Organism(s) <sup>a</sup> | Implant-DAIR duration (weeks) <sup>b</sup> | Symptom onset-DAIR (days) <sup>c</sup> | KLIC-score | Treatment failure |
|---------|-----|--------|------------------|--------------|--------------------------|--------------------------------------------|----------------------------------------|------------|-------------------|
| 42      | 72  | f      | Revision         | TKA          | CoNS                     | 9w 4d                                      | 15                                     | 8          | Yes               |
| 43      | 67  | f      | Revision         | TKA          | CoNS                     | 12w                                        | 67                                     | 3.5        | No                |
| 44      | 79  | m      | Primary          | TKA          | CoNS                     | 115w                                       | 19                                     | 6.5        | No                |
| 45      | 68  | m      | Primary          | TKA          | CoNS                     | 115w                                       | 4                                      | 2          | No                |
| 46      | 68  | m      | Revision         | TKA          | CoNS                     | 3w 5d                                      | 10                                     | 7.5        | No                |
| 47      | 69  | m      | Primary          | UKA          | CoNS                     | 4w 3d                                      | -                                      | 0          | No                |
| 48      | 83  | f      | Primary          | TKA          | CoNS                     | 12w 5d                                     | 89                                     | 4.5        | No                |
| 49      | 73  | f      | Revision         | TKA          | E. Cloacae               | 8w 5d                                      | 61                                     | 3.5        | No                |
| 50      | 65  | m      | Primary          | TKA          | E. Coli, M. Morganii     | 2w 1d                                      | -                                      | 3.5        | Yes               |
| 51      | 82  | m      | Primary          | TKA          | E. Coli                  | 145w 3d                                    | 7                                      | 4.5        | No                |
| 52      | 67  | f      | Primary          | TKA          | Group G Strep.           | 88w 6d                                     | 5                                      | 4.5        | No                |
| 53      | 65  | m      | Primary          | TKA          | Group G Strep.           | 118w 5d                                    | 6                                      | 6          | Yes               |
| 54      | 59  | m      | Primary          | TKA          | Group G Strep.           | 124w 3d                                    | 5                                      | 6.5        | No                |
| 55      | 59  | m      | Primary          | TKA          | Group G Strep.           | 124w 3d                                    | 7                                      | 4.5        | No                |
| 56      | 78  | m      | Primary          | TKA          | Group G Strep.           | 246w                                       | 3                                      | 2          | No                |
| 57      | 71  | m      | Primary          | TKA          | Group G Strep.           | 279w 6d                                    | 8                                      | 4.5        | Yes               |
| 58      | 86  | f      | Primary          | TKA          | Group G Strep.           | 552w                                       | 3                                      | 2          | Yes               |
| 59      | 77  | m      | Revision         | TKA          | Group C Strep.           | 34w 6d                                     | -                                      | 5.5        | No                |

a. 'No growth' indicates patients where the infecting organism was not identified prior to debridement

b. Where there is no Implant - DAIR duration - this indicates documentation of such dates was incomplete

c. Where there is no symptom onset - DAIR duration - this indicates documentation of such dates was incomplete

TKA - Total Knee Arthroplasty, PFJR - Patello-femoral Joint Replacement, UKA - Unicompartmental Knee Arthroplasty

SA - *Staphylococcus aureus*, CoNS - *coagulase negative Staphylococci*, E. Coli - *Escherichia coli*, E. cloacae - *Enterobacter cloacae*
